# Supplementary material for: The first de novo transcriptome of pepino (Solanum muricatum): assembly, comprehensive analysis and comparison with the closely related species S. caripense, potato and tomato
Source: PubMed Central journal article supplement (PMC4855764; doi:10.1186/s12864-016-2656-8), 2016-05-04

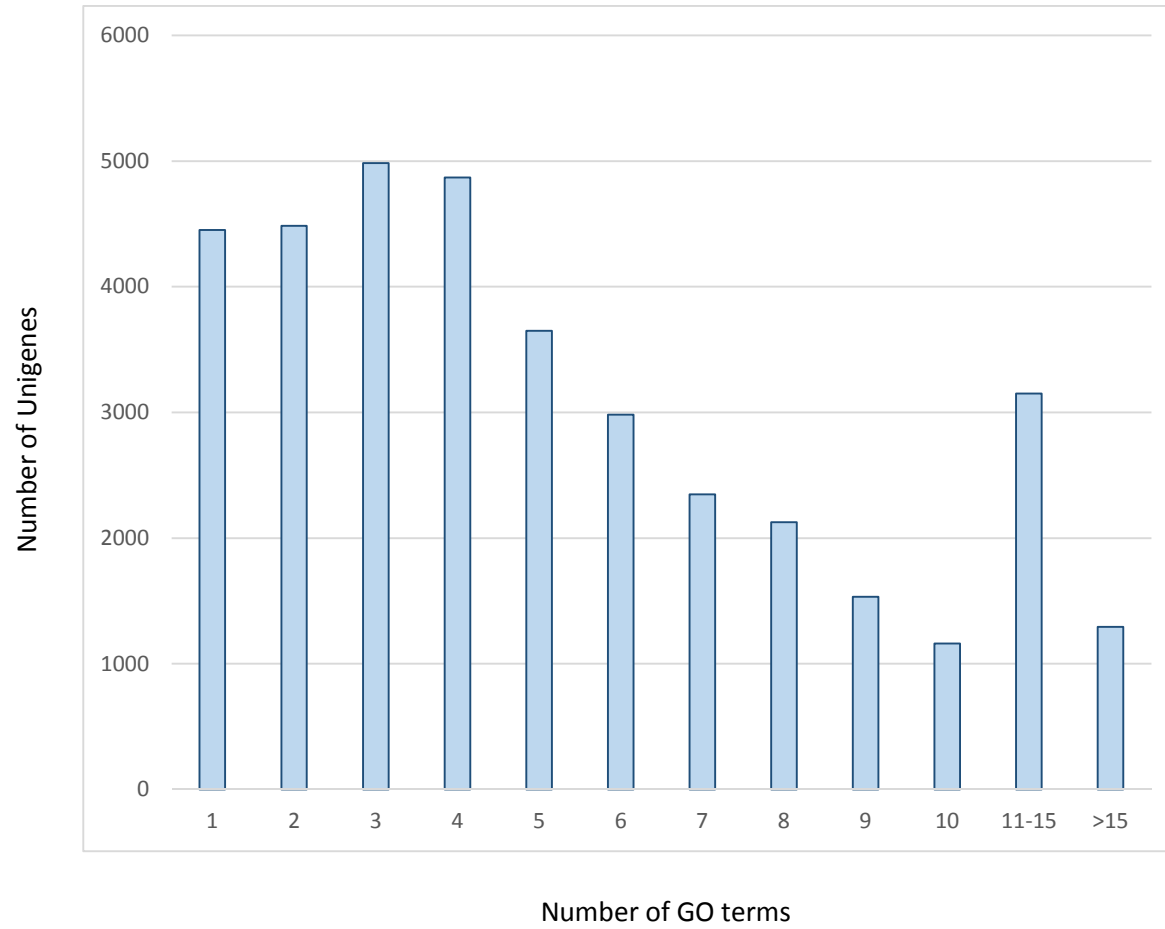

Supplement: 12864_2016_2656_MOESM5_ESM.pdf [file 12864_2016_2656_MOESM5_ESM.pdf]
